# Supplementary material for: Two-Level 3D Column-like Nanofilms with Hexagonally–Packed Tantalum Fabricated via Anodizing of Al/Nb and Al/Ta Layers—A Potential Nano-Optical Biosensor
Source: MDPI journal article supplement (doi:10.3390/ma16030993), 2023-01-21
Supplement: s1 [file s1]

# Supplementary Materials: Two-level 3D Column-like Nanofilms with Hexagonally-Packed Tantalum Fabricated via Anodizing of Al/Nb and Al/Ta Layers – A Potential Nano-optical Biosensor

Andrei Pligovka <sup>1,2,\*</sup>, Andrei Lazavenka <sup>1,2</sup>, Ulyana Turavets <sup>1,2</sup>, Alexander Hoha <sup>1,2</sup>, and Marco Salerno <sup>3</sup>

- 1 Research and Development Laboratory 4.10 “Nanotechnologies”, Belarusian State University of Informatics and Radioelectronics, 6 P. Brovki Str., 220013 Minsk, Belarus
- 2 Department of Micro- and Nanoelectronics, Belarusian State University of Informatics and Radioelectronics, 6 P. Brovki Str., 220013 Minsk, Belarus
- 3 Institute for Globally Distributed Open Research and Education (IGDORE), Institute for Materials Science, Max Bergmann Center of Biomaterials, Technische Universität Dresden, 27 Budapester Str., 010169 Dresden, Germany

\* Correspondence: pligovka@bsuir.by; Tel.: +375-44-730-95-81; Fax: +375-17-293-23-56

**Figure S1.** 3D animation representation of the two-level column-like 3D anodic nanofilms biosensor operation principles.

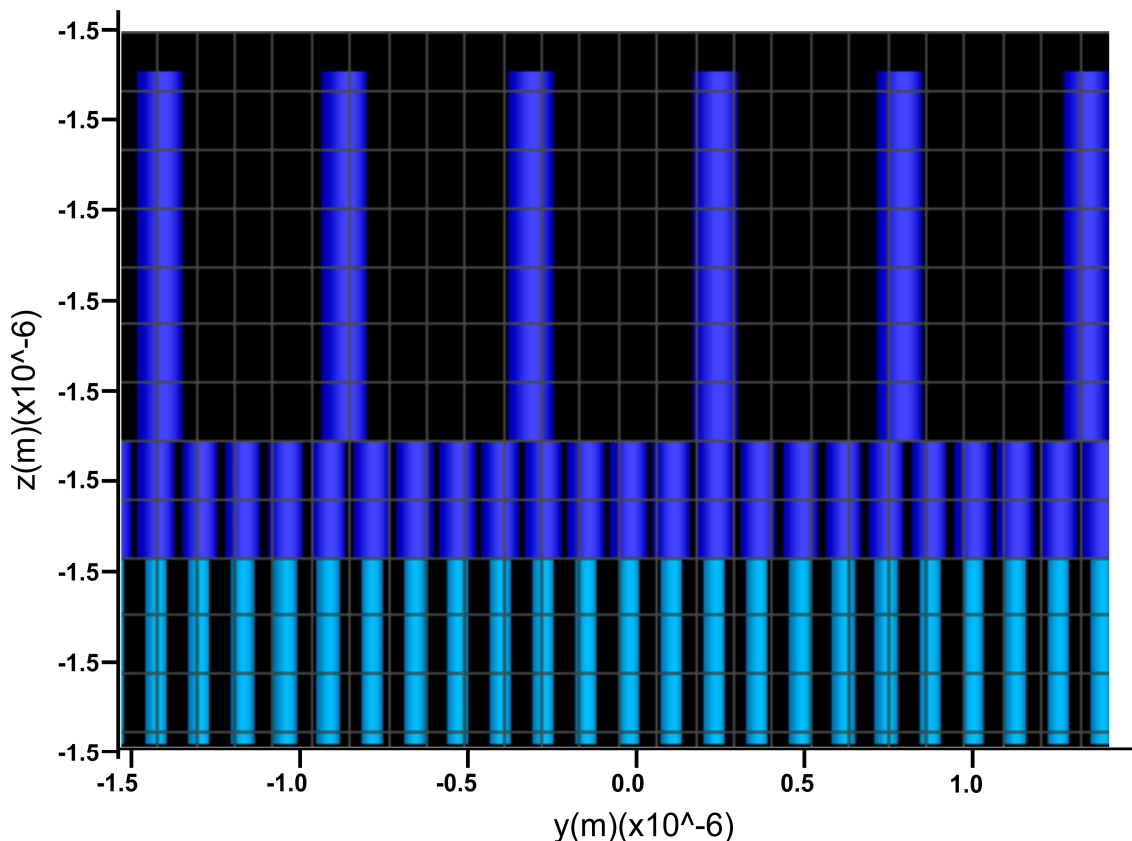

**Figure S2.** FDTD simulation of two-level 3-D column-like nanofilms ZY view by Lumerical Inc. software.

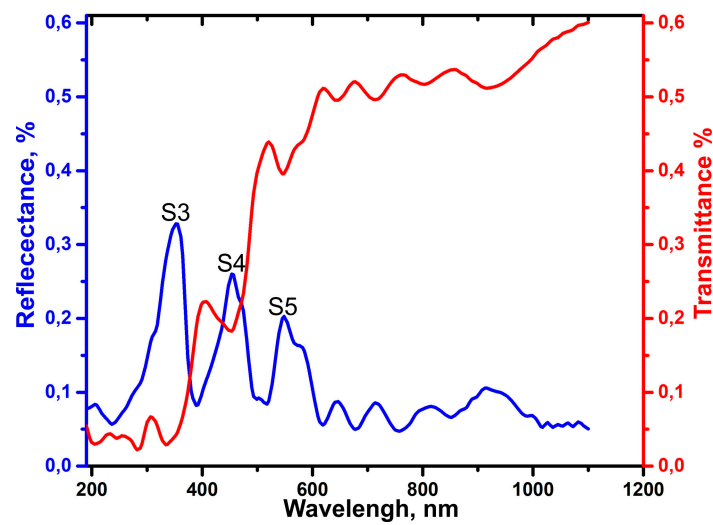

**Figure S3.** FDTD simulated transmittance and reflectance spectra as a function of wavelength for the two-level 3-D column-like nanofilms with marked three points of maximums on the reflection curve at 355 nm(S3), 456 nm(S4), 548 nm(S5) wavelength.

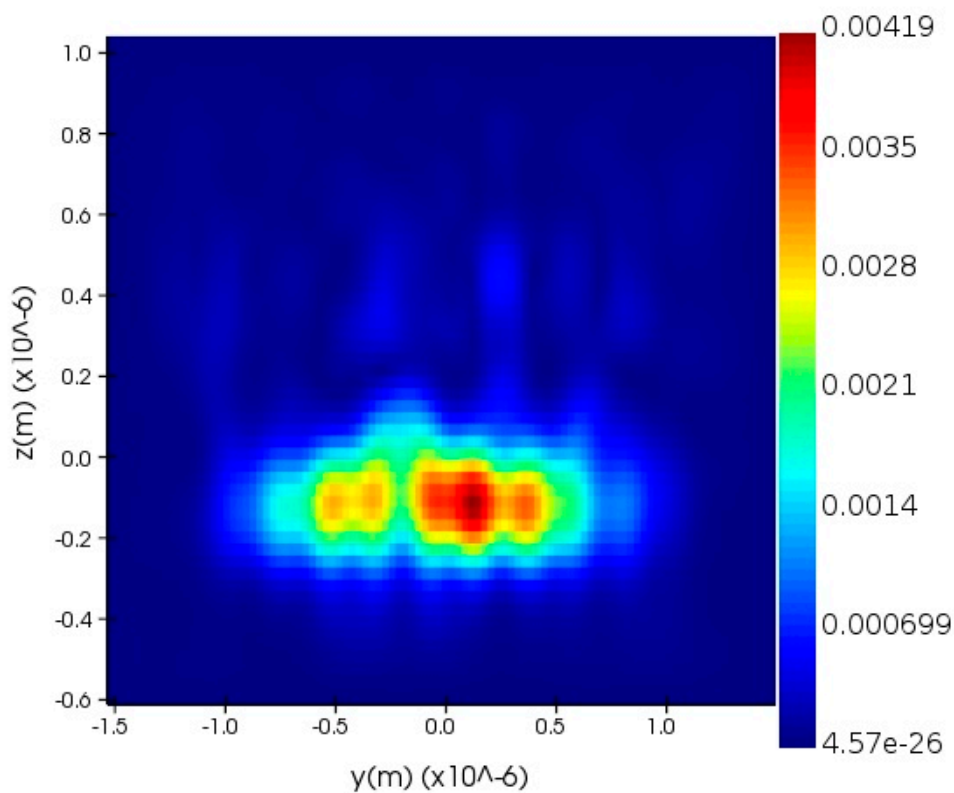

**Figure S4.** Poynting vector as the electromagnetic field distribution (control by YZ-plane reflectance monitor) for the first maximum of reflectance on 355 nm (S3) wavelength according to the reflectance curve on Figure S2.

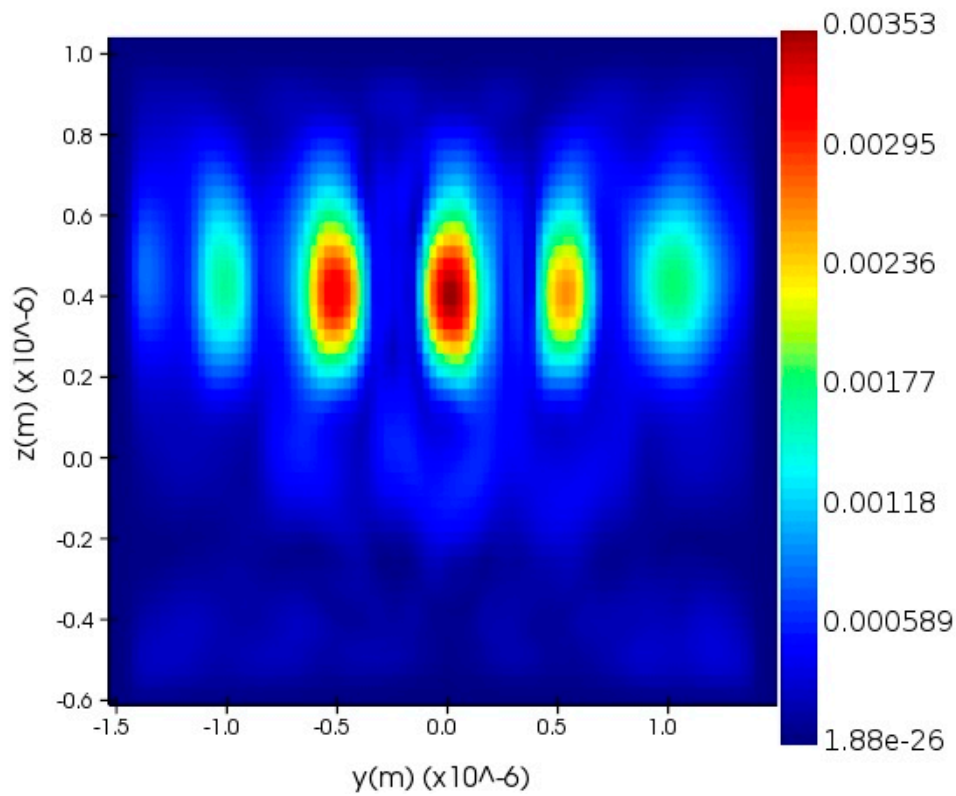

**Figure S5.** Poynting vector as the electromagnetic field distribution (control by YZ-plane reflectance monitor) for the second maximum of reflectance on 456 nm(S4) wavelength according to the reflectance curve on Figure S2.

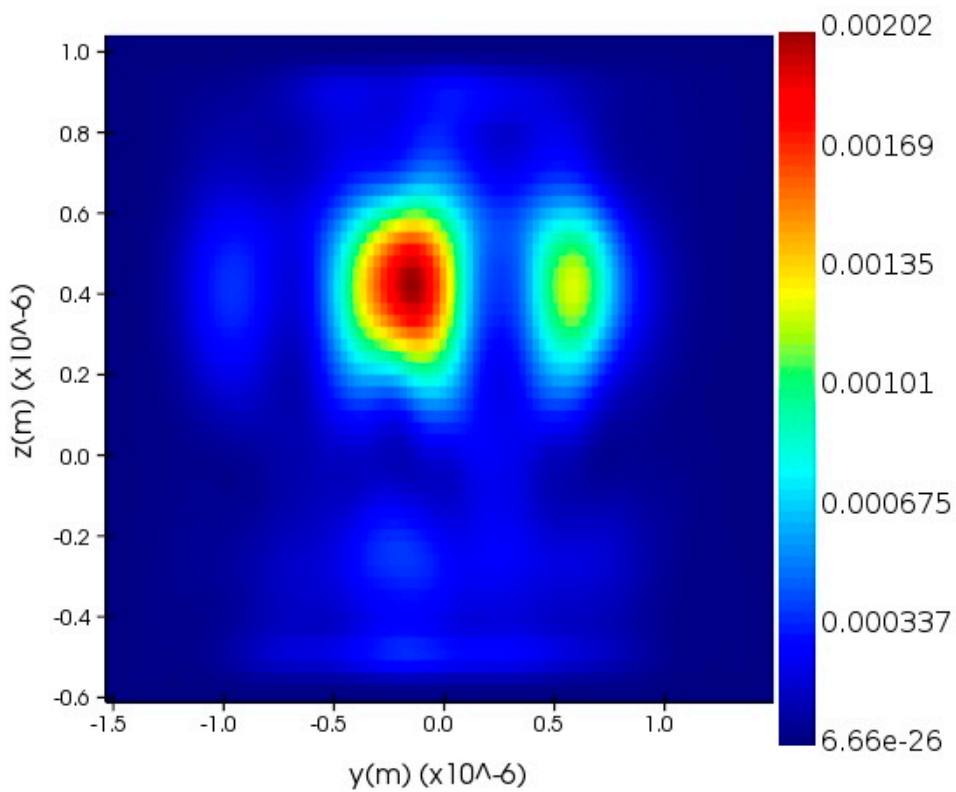

**Figure S6.** Poynting vector as the electromagnetic field distribution (control by YZ-plane reflectance monitor) for the third maximum of reflectance on 548 nm(S5) wavelength according to the reflectance curve on Figure S2.
